# Supplementary material for: Correcting for Differential Transcript Coverage Reveals a Strong Relationship between Alternative Splicing and Organism Complexity
Source: PubMed Central journal article supplement (PMC4032128; doi:10.1093/molbev/msu083), 2014-03-27
Supplement: supp_msu083_Supplementary_Figure_4.pdf [file supp_msu083_Supplementary_Figure_4.pdf]

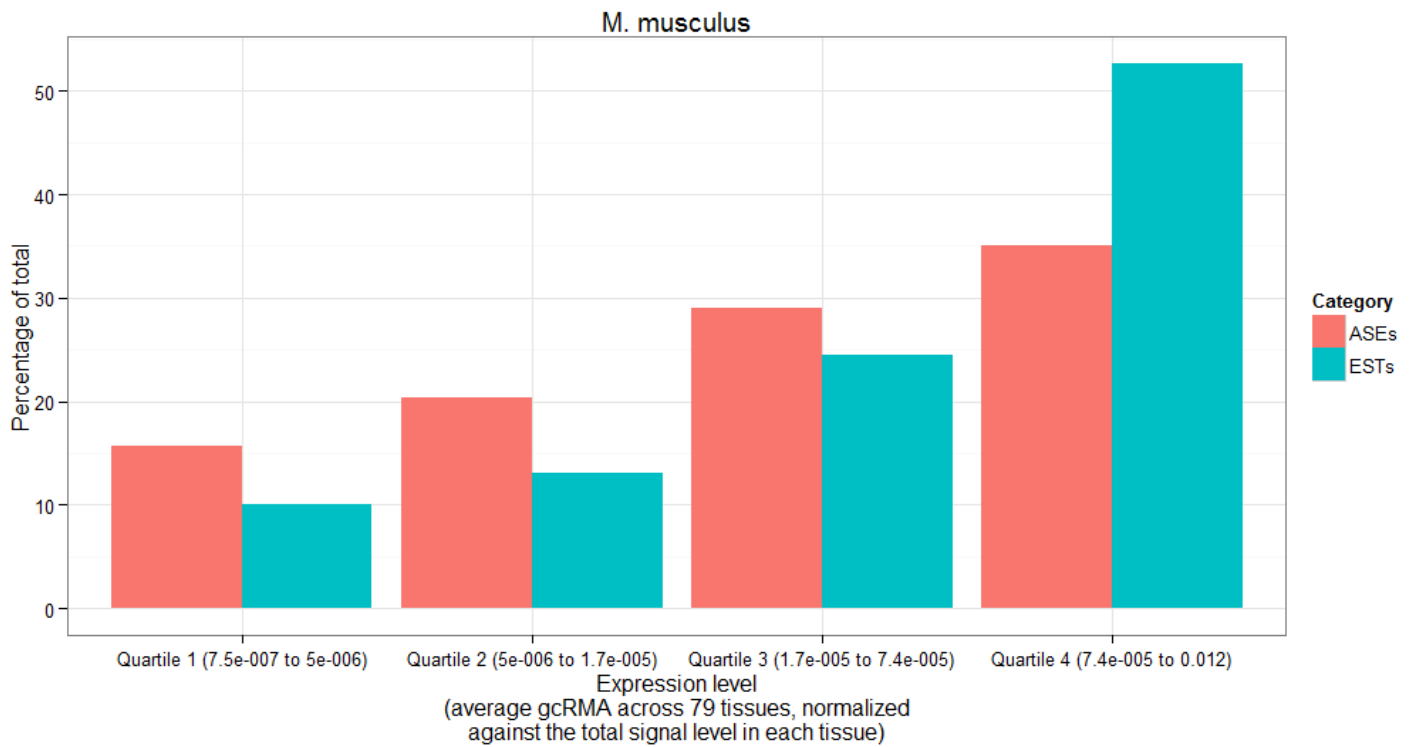

**Supplementary Figure 4.** Distribution of both alternative splicing events ( $n = 45,628$ ) and ESTs ( $n = 1,403,152$ ) for the genome of *M. musculus*, according to the expression level of the associated gene. Expression data is partitioned into quartiles each of size  $n = 1812$ . Correlations of the number of alternative splicing events and the number of ESTs against expression level are significant in both cases (Spearman's  $\rho = 0.32$ ,  $p < 2.2e^{-16}$  and  $\rho = 0.51$ ,  $p < 2.2e^{-16}$ ).
